# Supplementary material
Source: PubMed Central journal article supplement (PMC4256850)
Supplement: supp_pp.114.247759_247759supp.pdf [file supp_pp.114.247759_247759supp.pdf]

Regulatory properties of ADP glucose pyrophosphorylase are required for adjustment of leaf starch synthesis and hence normal growth in different photoperiods<sup>1[W]</sup>

Sam T. Mugford, Olivier Fernandez, Jemima Brinton, Anna Flis, Nicole Krohn, Beatrice Encke, Regina Feil, Ronan Sulpice, John E. Lunn, Mark Stitt and Alison M. Smith

## SUPPORTING INFORMATION

**Figure S1.** Diel changes in levels of transcripts encoding AGPase large subunits.

**Figure S2.** Immunoprecipitation with an antiserum to the AGPase small subunit.

**Figure S3.** Metabolite levels in wild-type and GlgC-TM plants grown in different day lengths.

**Figure S4.** Relative growth rates of wild-type and GlgC-TM plants grown in different day lengths.

**Table S1.** Rates of starch synthesis in different photoperiods.

**Table S2.** Metabolite contents of rosettes.

**Table S3.** Activities of enzymes of primary metabolism

**Table S4.** Primers used in this study.

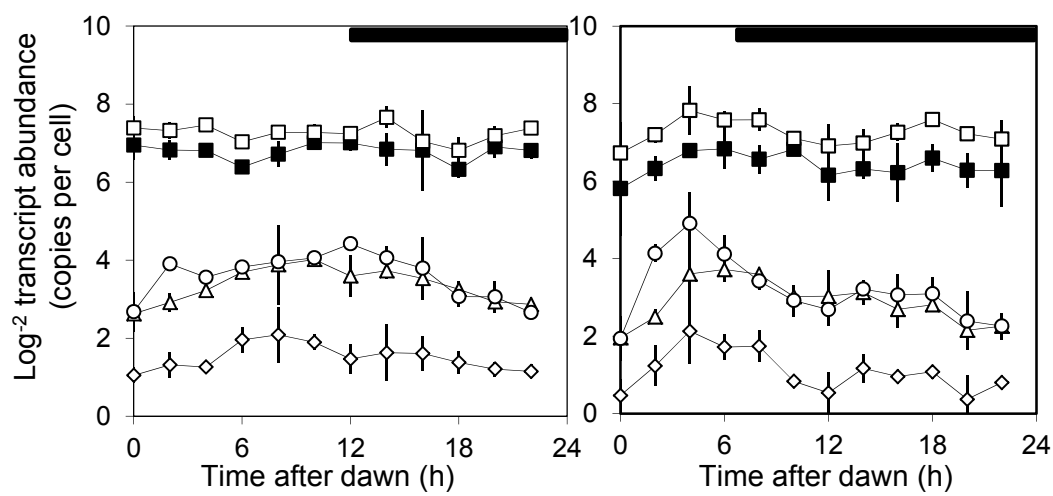

**Figure S1.** Diel changes in levels of transcripts encoding AGPase large subunits.

qRT-PCR measurements of transcript levels of AGPase subunits in rosettes of plants grown in 12:12 (left graph) or 6:18 (right graph) conditions and harvested at two-h intervals. Black bars indicate the hours of darkness. Values are means  $\pm$  the difference of two biological replicates. Closed symbols: *APS1*. Open symbols: squares *APL1*, circles *APL3*, triangles *APL2*, diamonds *APL4*.

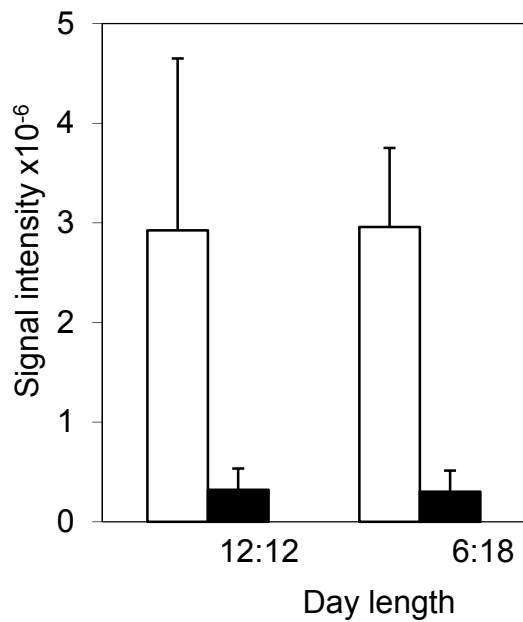

**Figure S2.** Immunoprecipitation with an antiserum to the AGPase small subunit.

Abundance of APS1 (white bars) and APL1 (black bars) peptides in proteins immunoprecipitated with an APS1 antiserum, from MALDI-ToF MS analysis of tryptic fragments. MALDI-ToF analysis. Proteins the range 50 to 60 kD were separated by SDS-PAGE from preparations from rosettes of plants grown in either 12:12 or 6:18 conditions, excised from the gel and subjected to tryptic digestion. Values are means  $\pm$  SE of measurements on three separate immunoprecipitates from one extract. Similar results were obtained with a second, independent extract..

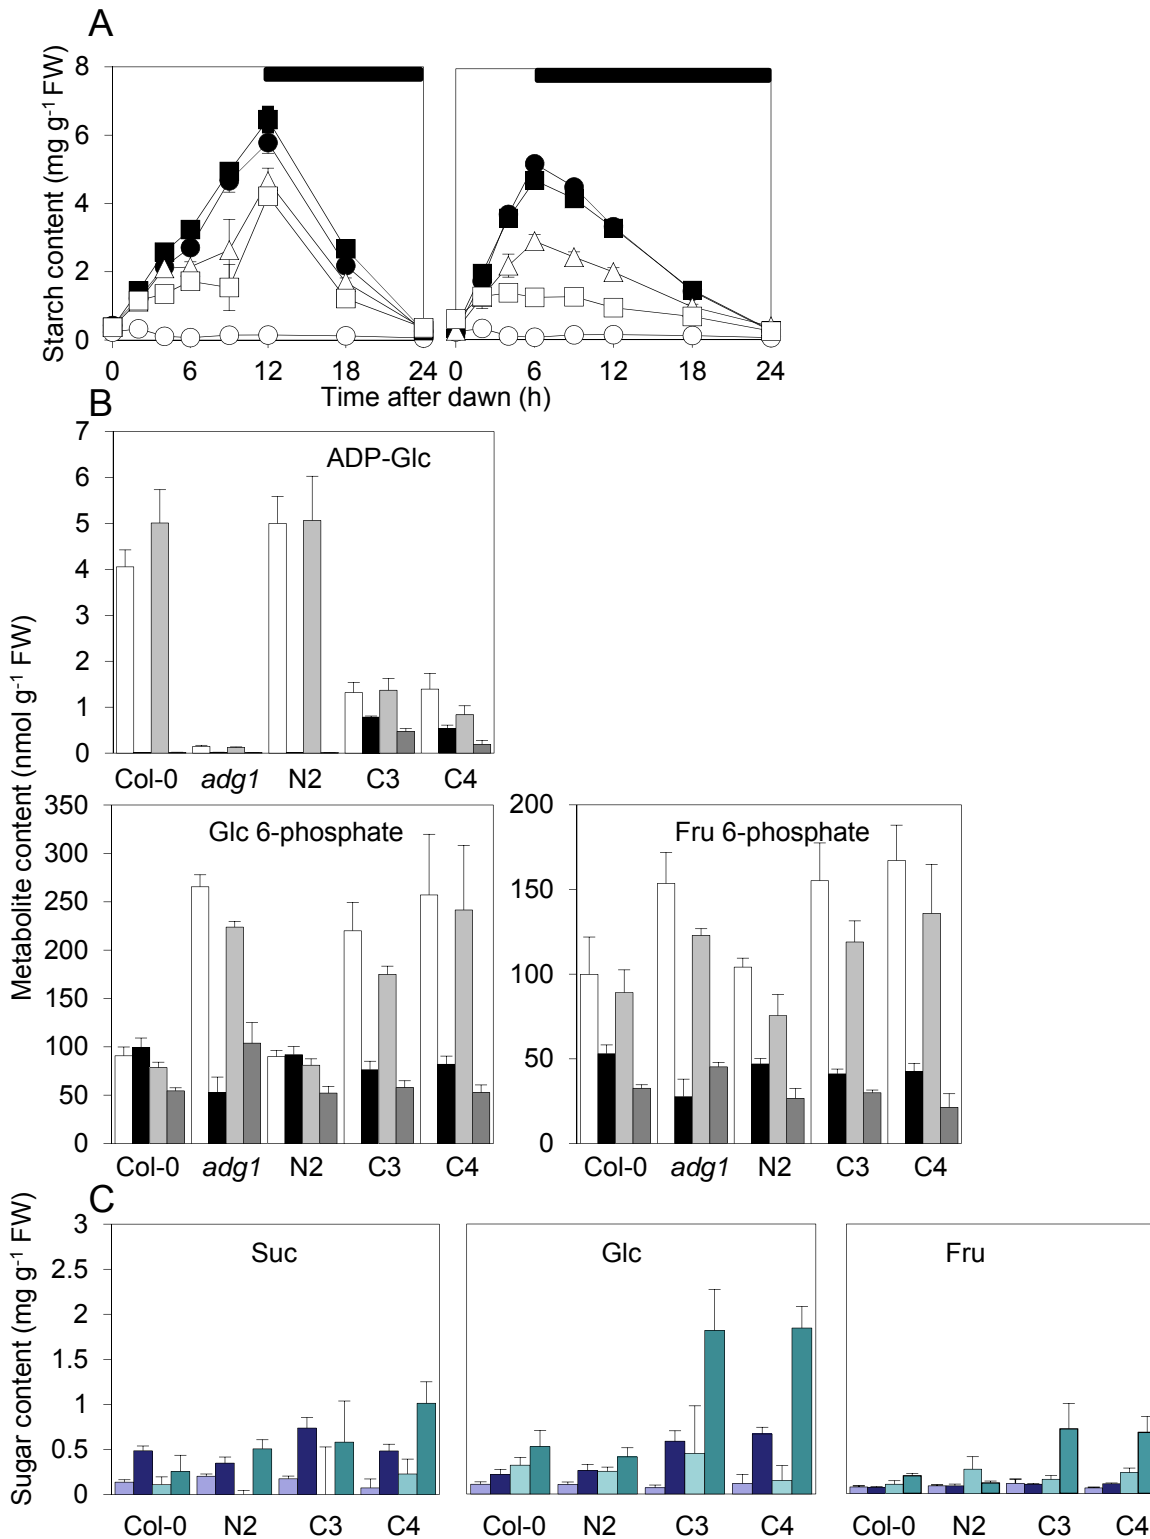

**Figure S3.** Metabolite levels in wild-type and GlgC-TM plants grown in different day lengths. A, Starch content over 24 h in plants grown in 12:12 (left: 21-day old plants) or 6:18 (right: 28-day old plants) conditions. ●, wild-type (Col-0); ■, *APS1*-expressing line N2; △, *GlgC-TM*-expressing line C3; □, *GlgC-TM*-expressing line C4; ○, *adg2*. This is a repetition of the experiment in Figure 4b, on a separately-grown batch of plants. Values are means  $\pm$  SE of measurements made on six plants. B, Metabolite contents of wild-type (Col-0) plants, *APS1*-expressing line N2 and *GlgC-TM*-expressing lines C3 and C4. Plants were grown in 12:12 conditions and harvested at ZT3 (white) or ZT15 (black) or grown in 6:18 conditions and harvested at ZT3 (light grey) or ZT9 (dark grey). Values are means  $\pm$  SD of measurements on five plants. Hexose phosphate data are also presented in Table S1. C, Sugar contents of plants as in (b), grown in 12:12 conditions and harvested at ZT0 (light indigo) or ZT6 (dark indigo) or grown in 6:18 conditions and harvested at ZT0 (light aqua) or ZT6 (dark aqua).

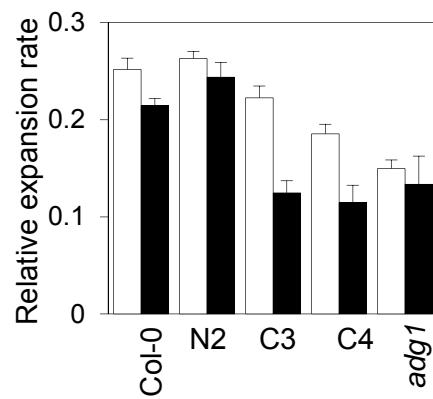

**Figure S4.** Relative rates of rosette expansion of wild-type and GlgC-TM plants grown in different day lengths.

Relative rosette expansion rates were measured in wild-type (Col-0) plants, *adg1* mutants, *APS1*-expressing line N2 and *GlgC-TM* expressing lines C3 and C4. Plants were photographed after 13 and 16 days of growth in 12:12 conditions (white bars) and after 20 and 23 days in 6:18 conditions (black bars). These time intervals were chosen because they give similar values in the two conditions for wild-type plants. Rosette areas were measured from photographs, and the relative expansion rate ( $\text{cm}^2 \text{cm}^{-2}$ ) between the two time points was calculated as  $((\ln(A_2) - \ln(A_1)) / t)$ ; where  $A_1$  and  $A_2$  = area at first and second time point,  $t$  = time between them. Values are means  $\pm$  SE calculated from measurements on 53 to 72 replicate plants per genotype.

Table S1

Rates of starch synthesis in different photoperiods. Linear regression was used to calculate mean rates of starch synthesis over the light period, standard errors of means (SE), and the significance of the difference in rate between photoperiods ( $p$ -value). Values were taken from the Figures indicated.

| Rates of starch synthesis from Figure 1a |             |                                                                        |      |                      |
|------------------------------------------|-------------|------------------------------------------------------------------------|------|----------------------|
| Genotype                                 | Photoperiod | Rate of synthesis<br>(mg h <sup>-1</sup> g <sup>-1</sup> fresh weight) | SE   | $p$ -value vs. 12:12 |
| WT Col-0                                 | 12:12       | 0.45                                                                   | 0.03 |                      |
|                                          | 06:18       | 0.68                                                                   | 0.04 | <0.001               |
| WT Ws                                    | 12:12       | 0.60                                                                   | 0.03 |                      |
|                                          | 06:18       | 0.96                                                                   | 0.05 | <0.001               |
| <i>gi-201</i>                            | 12:12       | 0.58                                                                   | 0.04 |                      |
|                                          | 06:18       | 0.85                                                                   | 0.08 | 0.098                |
| <i>fkf1</i>                              | 12:12       | 0.44                                                                   | 0.02 |                      |
|                                          | 06:18       | 0.48                                                                   | 0.04 | 0.108                |
| <i>lhy cca1</i>                          | 12:12       | 0.29                                                                   | 0.02 |                      |
|                                          | 06:18       | 0.57                                                                   | 0.06 | <0.001               |
| <i>co-10</i>                             | 12:12       | 0.36                                                                   | 0.02 |                      |
|                                          | 06:18       | 0.57                                                                   | 0.04 | 0.001                |
| <i>elf3</i>                              | 12:12       | 0.37                                                                   | 0.02 |                      |
|                                          | 06:18       | 0.50                                                                   | 0.10 | 0.011                |
| <i>pif4</i>                              | 12:12       | 0.47                                                                   | 0.02 |                      |
|                                          | 06:18       | 0.77                                                                   | 0.05 | <0.001               |

  

| Rates of starch synthesis from Figure 1b |             |                                                                        |      |                      |
|------------------------------------------|-------------|------------------------------------------------------------------------|------|----------------------|
| Genotype                                 | Photoperiod | Rate of synthesis<br>(mg h <sup>-1</sup> g <sup>-1</sup> fresh weight) | SE   | $p$ -value vs. 12:12 |
| Wt Col0                                  | 12:12       | 0.42                                                                   | 0.06 |                      |
|                                          | 06:18       | 0.85                                                                   | 0.08 | <0.001               |
| <i>gi-201</i>                            | 12:12       | 0.31                                                                   | 0.10 |                      |
|                                          | 06:18       | 0.37                                                                   | 0.06 | 0.971                |
| <i>gi-2</i>                              | 12:12       | 0.46                                                                   | 0.06 |                      |
|                                          | 06:18       | 0.48                                                                   | 0.08 | 0.234                |
| <i>fkf1</i>                              | 12:12       | 0.37                                                                   | 0.03 |                      |
|                                          | 06:18       | 0.39                                                                   | 0.10 | 0.758                |
| <i>co-10</i>                             | 12:12       | 0.35                                                                   | 0.06 |                      |
|                                          | 06:18       | 0.74                                                                   | 0.08 | <0.001               |

  

| Rates of starch synthesis from Figure 3b |             |                                                                        |      |                         |
|------------------------------------------|-------------|------------------------------------------------------------------------|------|-------------------------|
| Genotype                                 | Photoperiod | Rate of synthesis<br>(mg h <sup>-1</sup> g <sup>-1</sup> fresh weight) | SE   | $p$ -value vs.<br>12:12 |
| WT                                       | 12:12       | 0.46                                                                   | 0.02 |                         |
|                                          | 06:18       | 0.84                                                                   | 0.03 | <0.001                  |
| N2                                       | 12:12       | 0.50                                                                   | 0.02 |                         |
|                                          | 06:18       | 0.74                                                                   | 0.03 | <0.001                  |
| C3                                       | 12:12       | 0.32                                                                   | 0.03 |                         |
|                                          | 06:18       | 0.44                                                                   | 0.04 | 0.125                   |
| C4                                       | 12:12       | 0.26                                                                   | 0.04 |                         |
|                                          | 06:18       | 0.10                                                                   | 0.05 | 0.934                   |

|               |       |     |       |
|---------------|-------|-----|-------|
| <i>adg1-1</i> | 12:12 | n/a | 0.245 |
|               | 06:18 | n/a |       |

---

Rates of starch synthesis from Figure 5a

---

| Genotype | Photoperiod | Rate of synthesis<br>(mg h <sup>-1</sup> g <sup>-1</sup> fresh weight) | SE   | p-value vs. 12:12 |
|----------|-------------|------------------------------------------------------------------------|------|-------------------|
| WT       | 12:12       | 0.33                                                                   | 0.02 |                   |
|          | 06:18       | 0.94                                                                   | 0.07 | <0.001            |
| Line A   | 12:12       | 0.37                                                                   | 0.03 |                   |
|          | 06:18       | 0.99                                                                   | 0.05 | <0.001            |
| Line B   | 12:12       | 0.32                                                                   | 0.02 |                   |
|          | 06:18       | 0.90                                                                   | 0.05 | <0.001            |

---

Rates of starch synthesis from Figure 5b

---

| Genotype      | Photoperiod | Rate of synthesis<br>(mg h <sup>-1</sup> g <sup>-1</sup> fresh weight) | SE   | p-value vs. 12:12 |
|---------------|-------------|------------------------------------------------------------------------|------|-------------------|
| WT col-0      | 12:12       | 0.61                                                                   | 0.02 |                   |
|               | 06:18       | 1.08                                                                   | 0.10 | <0.001            |
| <i>adg2</i>   | 12:12       | 0.37                                                                   | 0.03 |                   |
|               | 06:18       | 0.54                                                                   | 0.06 | 0.015             |
| <i>adg1-1</i> | 12:12       | n/a                                                                    |      |                   |
|               | 06:18       | n/a                                                                    |      | <0.001*           |

---

\* a significant effect of photoperiod on starch content was detected in this experiment, but there was no net synthesis during the day so this does not equate to a difference in the rate of synthesis)

Table S2. Metabolite contents.

Metabolite contents of wild-type (Col-0) plants, *APS1*-expressing line N2 and *GlgC-TM*-expressing lines C3 and C4. Plants were grown in 12:12 conditions and harvested at ZT3 or ZT15 or grown in 6:18 conditions and harvested at ZT3 or ZT9. S6P is sedoheptulose 6-phosphate, Gly3P is glycerol 3-phosphate, 2-OG is 2-oxoglutarate. Values for hexose phosphates are also presented in Figure 4b and Figure S3b. Values are means  $\pm$  SD of measurements on five plants. Data were analyzed using a general linear model and ANOVA to test for the effects of genotype, including time of day and photoperiod as covariants. Metabolites that show significant differences between genotypes with the endogenous AGPase (WT and N2) and those with the *GlgC-TM* AGPase (C3 and C4) are indicated by the *p*-value displayed in the table. ND = not detected.

| Day length and time of day | Genotype    | Metabolite                        |              |              |                 |                 |                 |                |              |                |
|----------------------------|-------------|-----------------------------------|--------------|--------------|-----------------|-----------------|-----------------|----------------|--------------|----------------|
|                            |             | nmol g <sup>-1</sup> fresh weight |              |              |                 |                 |                 |                |              |                |
| <i>p</i> -value            |             | Glc 1P                            | Glc 6P       | Fru 6P       | Tre 6P          | S6P             | Gal 6P          | Gly3P          | UDPGlc       | Man6P          |
|                            |             | <0.001                            | <0.001       | 0.001        | <0.001          | 0.018           | 0.221           | 0.018          | 0.457        | 0.534          |
| 12:12, ZT3                 | Wt          | 18.6 $\pm$ 3.3                    | 91 $\pm$ 9   | 100 $\pm$ 22 | 0.46 $\pm$ 0.10 | 1.27 $\pm$ 0.37 | 2.55 $\pm$ 0.75 | 21.0 $\pm$ 5.4 | 108 $\pm$ 20 | 19.3 $\pm$ 1.1 |
|                            | <i>adg1</i> | 38.4 $\pm$ 4.1                    | 266 $\pm$ 12 | 154 $\pm$ 18 | 0.37 $\pm$ 0.01 | 3.87 $\pm$ 0.89 | 2.87 $\pm$ 0.17 | 18.7 $\pm$ 1.9 | 78 $\pm$ 7   | 26.5 $\pm$ 2.4 |
|                            | N2          | 21.0 $\pm$ 0.9                    | 90 $\pm$ 6   | 104 $\pm$ 5  | 0.50 $\pm$ 0.13 | 1.46 $\pm$ 0.17 | 3.02 $\pm$ 0.52 | 24.6 $\pm$ 2.7 | 132 $\pm$ 4  | 22.6 $\pm$ 3.7 |
|                            | C3          | 37.9 $\pm$ 6.5                    | 220 $\pm$ 29 | 155 $\pm$ 22 | 0.99 $\pm$ 0.11 | 2.31 $\pm$ 0.31 | 2.65 $\pm$ 0.29 | 23.7 $\pm$ 5.8 | 98 $\pm$ 18  | 23.5 $\pm$ 3.5 |
|                            | C4          | 39.4 $\pm$ 4.0                    | 257 $\pm$ 63 | 167 $\pm$ 21 | 0.97 $\pm$ 0.22 | 2.34 $\pm$ 0.19 | 3.02 $\pm$ 0.78 | 24.4 $\pm$ 2.9 | 115 $\pm$ 18 | 26.7 $\pm$ 3.4 |
| 12:12, ZT15                | Wt          | 22.2 $\pm$ 3.0                    | 100 $\pm$ 10 | 53 $\pm$ 5   | 0.23 $\pm$ 0.05 | 1.25 $\pm$ 0.17 | 4.46 $\pm$ 0.48 | 33.4 $\pm$ 2.3 | 141 $\pm$ 13 | 25.7 $\pm$ 0.6 |
|                            | <i>adg1</i> | 12.4 $\pm$ 4.1                    | 53 $\pm$ 16  | 28 $\pm$ 10  | 0.19 $\pm$ 0.07 | 0.49 $\pm$ 0.15 | 2.73 $\pm$ 0.88 | 23.2 $\pm$ 4.8 | 104 $\pm$ 33 | 13.3 $\pm$ 3.8 |
|                            | N2          | 18.6 $\pm$ 1.3                    | 92 $\pm$ 8   | 47 $\pm$ 3   | 0.23 $\pm$ 0.02 | 1.17 $\pm$ 0.13 | 3.87 $\pm$ 0.25 | 36.3 $\pm$ 8.4 | 114 $\pm$ 5  | 26.5 $\pm$ 2.8 |
|                            | C3          | 18.1 $\pm$ 1.3                    | 76 $\pm$ 9   | 41 $\pm$ 3   | 0.15 $\pm$ 0.01 | 0.69 $\pm$ 0.09 | 4.00 $\pm$ 0.26 | 26.1 $\pm$ 0.3 | 128 $\pm$ 8  | 22.2 $\pm$ 1.8 |
|                            | C4          | 17.7 $\pm$ 1.9                    | 82 $\pm$ 8   | 43 $\pm$ 5   | 0.11 $\pm$ 0.02 | 0.62 $\pm$ 0.02 | 3.74 $\pm$ 0.41 | 31.2 $\pm$ 2.5 | 136 $\pm$ 25 | 23.1 $\pm$ 2.9 |
| 6:18, ZT3                  | Wt          | 15.0 $\pm$ 2.1                    | 79 $\pm$ 9   | 89 $\pm$ 13  | 0.28 $\pm$ 0.33 | 0.91 $\pm$ 0.17 | 2.10 $\pm$ 0.39 | 17.0 $\pm$ 2.3 | 92 $\pm$ 14  | 15.4 $\pm$ 1.5 |
|                            | <i>adg1</i> | 28.1 $\pm$ 1.1                    | 224 $\pm$ 6  | 123 $\pm$ 4  | 0.41 $\pm$ 0.02 | 2.25 $\pm$ 0.15 | 2.33 $\pm$ 0.16 | 14.1 $\pm$ 0.6 | 66 $\pm$ 5   | 18.8 $\pm$ 1.0 |
|                            | N2          | 14.5 $\pm$ 2.0                    | 81 $\pm$ 7   | 76 $\pm$ 12  | 0.22 $\pm$ 0.04 | 0.81 $\pm$ 0.19 | 1.94 $\pm$ 0.29 | 15.8 $\pm$ 2.0 | 96 $\pm$ 18  | 15.2 $\pm$ 1.1 |
|                            | C3          | 28.4 $\pm$ 3.7                    | 175 $\pm$ 8  | 119 $\pm$ 12 | 0.69 $\pm$ 0.08 | 2.02 $\pm$ 0.36 | 2.19 $\pm$ 0.39 | 17.1 $\pm$ 2.3 | 87 $\pm$ 17  | 20.0 $\pm$ 1.4 |
|                            | C4          | 31.0 $\pm$ 5.4                    | 242 $\pm$ 67 | 136 $\pm$ 29 | 0.69 $\pm$ 0.16 | 1.82 $\pm$ 0.32 | 2.16 $\pm$ 0.41 | 18.1 $\pm$ 3.7 | 78 $\pm$ 16  | 25.1 $\pm$ 8.1 |
| 6:18, ZT9                  | Wt          | 11.8 $\pm$ 0.6                    | 54 $\pm$ 3   | 33 $\pm$ 2   | 0.08 $\pm$ 0.01 | 0.35 $\pm$ 0.02 | 2.94 $\pm$ 0.23 | 29.2 $\pm$ 0.6 | 78 $\pm$ 9   | 19.8 $\pm$ 1.8 |
|                            | <i>adg1</i> | 12.8 $\pm$ 0.4                    | 104 $\pm$ 21 | 45 $\pm$ 3   | 0.29 $\pm$ 0.01 | 0.44 $\pm$ 0.01 | 2.81 $\pm$ 0.27 | 12.4 $\pm$ 1.8 | 96 $\pm$ 17  | 16.6 $\pm$ 1.8 |
|                            | N2          | 9.2 $\pm$ 1.6                     | 52 $\pm$ 7   | 27 $\pm$ 6   | 0.06 $\pm$ 0.01 | 0.26 $\pm$ 0.04 | 2.38 $\pm$ 0.60 | 24.9 $\pm$ 2.4 | 67 $\pm$ 23  | 19.0 $\pm$ 2.7 |
|                            | C3          | 11.5 $\pm$ 0.3                    | 58 $\pm$ 7   | 30 $\pm$ 2   | 0.08 $\pm$ 0.01 | 0.23 $\pm$ 0.01 | 2.50 $\pm$ 0.23 | 21.6 $\pm$ 2.4 | 93 $\pm$ 12  | 17.1 $\pm$ 1.3 |
|                            | C4          | 7.5 $\pm$ 3.6                     | 53 $\pm$ 8   | 21 $\pm$ 8   | 0.11 $\pm$ 0.08 | 0.13 $\pm$ 0.05 | 1.40 $\pm$ 0.88 | 12.0 $\pm$ 6.1 | 57 $\pm$ 41  | 12.0 $\pm$ 4.1 |



Table S2 continued.

| Day length and time of day | Genotype    | Metabolite                        |             |           |             |          |          |          |            |            |
|----------------------------|-------------|-----------------------------------|-------------|-----------|-------------|----------|----------|----------|------------|------------|
|                            |             | nmol g <sup>-1</sup> fresh weight |             |           |             |          |          |          |            |            |
| <i>p</i> -value            |             | PEP                               | shikimate   | aconitate | Iso-citrate | pyruvate | 2-OG     | 3-PGA    | Fru 1,6BP  | succinate  |
|                            |             | 0.155                             | 0.270       | 0.275     | 0.944       | 0.020    | >0.001   | 0.303    | 0.150      | 0.004      |
| 12:12, ZT3                 | Wt          | 23.6 ± 2.4                        | 38.3 ± 1.6  | 109 ± 8   | 125 ± 7     | 115 ± 6  | 64 ± 4   | 290 ± 31 | 15.2 ± 0.4 | 240 ± 27   |
|                            | <i>adg1</i> | 29.9 ± 1.8                        | 29.9 ± 2.6  | 145 ± 15  | 140 ± 9     | 102 ± 13 | 77 ± 4   | 274 ± 17 | 18.5 ± 1.7 | 343 ± 81   |
|                            | N2          | 23.9 ± 7.3                        | 42.5 ± 3.3  | 142 ± 25  | 154 ± 16    | 174 ± 35 | 78 ± 10  | 311 ± 43 | 14.9 ± 0.5 | 429 ± 229  |
|                            | C3          | 21.1 ± 2.1                        | 40.9 ± 4.1  | 106 ± 12  | 123 ± 18    | 121 ± 28 | 83 ± 7   | 345 ± 66 | 14.0 ± 2.2 | 275 ± 49   |
|                            | C4          | 30.6 ± 9.6                        | 40.0 ± 3.2  | 119 ± 11  | 132 ± 32    | 122 ± 28 | 102 ± 18 | 374 ± 58 | 17.4 ± 4.1 | 346 ± 45   |
| 12:12, ZT15                | Wt          | 12.4 ± 3.1                        | 49.0 ± 6.1  | 156 ± 27  | 136 ± 27    | 148 ± 12 | 81 ± 5   | 131 ± 19 | 3.6 ± 0.4  | 545 ± 16   |
|                            | <i>adg1</i> | 5.7 ± 1.7                         | 54.4 ± 14.1 | 199 ± 35  | 167 ± 44    | 106 ± 24 | 159 ± 37 | 53 ± 9   | 1.4 ± 0.8  | 1527 ± 165 |
|                            | N2          | 11.8 ± 0.6                        | 50.8 ± 1.8  | 155 ± 18  | 137 ± 29    | 128 ± 17 | 80 ± 4   | 128 ± 5  | 3.0 ± 0    | 443 ± 11   |
|                            | C3          | 6.4 ± 1.4                         | 49.6 ± 3.8  | 152 ± 5   | 124 ± 3     | 116 ± 3  | 118 ± 42 | 80 ± 9   | 1.4 ± 0.9  | 697 ± 93   |
|                            | C4          | 9.4 ± 0.4                         | 49.3 ± 7.3  | 162 ± 32  | 147 ± 11    | 115 ± 9  | 142 ± 16 | 92 ± 4   | 1.6 ± 0.1  | 780 ± 147  |
| 6:18, ZT3                  | Wt          | 10.4 ± 1.6                        | 38.8 ± 4.0  | 102 ± 15  | 140 ± 41    | 111 ± 13 | 48 ± 2   | 237 ± 35 | 9.5 ± 1.7  | 144 ± 26   |
|                            | <i>adg1</i> | 31.8 ± 3.8                        | 29.1 ± 0.3  | 119 ± 3   | 155 ± 28    | 94 ± 8   | 66 ± 2   | 277 ± 14 | 18.0 ± 0.7 | 513 ± 41   |
|                            | N2          | 17.8 ± 1.3                        | 40.0 ± 6.4  | 95 ± 19   | 129 ± 43    | 106 ± 20 | 50 ± 5   | 271 ± 37 | 10.4 ± 0.5 | 148 ± 20   |
|                            | C3          | 21.4 ± 6.2                        | 35.0 ± 3.6  | 98 ± 11   | 132 ± 21    | 103 ± 15 | 74 ± 7   | 290 ± 5  | 11.6 ± 1.7 | 186 ± 38   |
|                            | C4          | 36.1 ± 7.5                        | 39.1 ± 7.9  | 95 ± 17   | 151 ± 48    | 93 ± 19  | 72 ± 22  | 346 ± 61 | 23.8 ± 5.0 | 211 ± 40   |
| 6:18, ZT9                  | Wt          | 18.9 ± 4.3                        | 42.6 ± 4.3  | 131 ± 13  | 142 ± 6     | 107 ± 7  | 53 ± 5   | 128 ± 6  | Nd         | 419 ± 42   |
|                            | <i>adg1</i> | 11.8 ± 5.4                        | 42.7 ± 7.0  | 129 ± 0   | 201 ± 10    | 103 ± 13 | 134 ± 22 | 91 ± 23  | 1.7 ± 0.9  | 1750 ± 237 |
|                            | N2          | 20.3 ± 3.0                        | 36.7 ± 5.0  | 105 ± 20  | 151 ± 30    | 82 ± 18  | 46 ± 7   | 113 ± 18 | Nd         | 328 ± 17   |
|                            | C3          | 20.9 ± 4.9                        | 38.9 ± 1.3  | 119 ± 11  | 166 ± 44    | 95 ± 19  | 83 ± 10  | 116 ± 9  | Nd         | 642 ± 44   |
|                            | C4          | 15.2 ± 3.3                        | 37.9 ± 12.9 | 89 ± 48   | 144 ± 74    | 83 ± 34  | 94 ± 19  | 79 ± 28  | 0.8 ± 0    | 748 ± 477  |

Table S2 continued.

| Day length and<br>time of day | Genotype    | Metabolite                          |                |               |
|-------------------------------|-------------|-------------------------------------|----------------|---------------|
|                               |             | $\mu\text{mol g}^{-1}$ fresh weight |                |               |
|                               |             | citrate                             | malate         | fumarate      |
| <i>p</i> -value               |             | 0.211                               | >0.001         | >0.001        |
| 12:12, ZT3                    | Wt          | 13.0 $\pm$ 1.1                      | 7.5 $\pm$ 1.4  | 3.5 $\pm$ 1.1 |
|                               | <i>adg1</i> | 14.2 $\pm$ 1.2                      | 4.9 $\pm$ 0.6  | 3.8 $\pm$ 0.9 |
|                               | N2          | 15.2 $\pm$ 2.4                      | 9.1 $\pm$ 1.4  | 3.6 $\pm$ 0.5 |
|                               | C3          | 12.9 $\pm$ 0.3                      | 4.6 $\pm$ 0.4  | 3.1 $\pm$ 0.2 |
|                               | C4          | 15.3 $\pm$ 2.6                      | 5.1 $\pm$ 0.7  | 3.0 $\pm$ 0.6 |
| 12:12, ZT15                   | Wt          | 15.1 $\pm$ 0.8                      | 14.8 $\pm$ 1.1 | 9.3 $\pm$ 1.0 |
|                               | <i>adg1</i> | 17.3 $\pm$ 3.7                      | 11.0 $\pm$ 2.1 | 7.4 $\pm$ 1.1 |
|                               | N2          | 15.1 $\pm$ 1.0                      | 11.5 $\pm$ 0.3 | 5.6 $\pm$ 0.8 |
|                               | C3          | 15.5 $\pm$ 1.0                      | 10.9 $\pm$ 1.2 | 6.3 $\pm$ 0.8 |
|                               | C4          | 16.4 $\pm$ 1.8                      | 10.2 $\pm$ 1.2 | 5.0 $\pm$ 0.6 |
| 6:18, ZT3                     | Wt          | 12.4 $\pm$ 1.1                      | 7.1 $\pm$ 0.7  | 3.9 $\pm$ 0.6 |
|                               | <i>adg1</i> | 12.9 $\pm$ 0.1                      | 3.7 $\pm$ 0.1  | 3.0 $\pm$ 0.1 |
|                               | N2          | 11.5 $\pm$ 1.8                      | 6.2 $\pm$ 1.2  | 2.9 $\pm$ 0.7 |
|                               | C3          | 12.3 $\pm$ 0.7                      | 3.8 $\pm$ 0.4  | 2.3 $\pm$ 0.4 |
|                               | C4          | 14.0 $\pm$ 3.0                      | 3.5 $\pm$ 0.8  | 2.1 $\pm$ 0.3 |
| 6:18, ZT9                     | Wt          | 13.7 $\pm$ 1.0                      | 7.4 $\pm$ 0.5  | 4.6 $\pm$ 0.3 |
|                               | <i>adg1</i> | 15.6 $\pm$ 0.9                      | 5.6 $\pm$ 0.1  | 4.3 $\pm$ 0.3 |
|                               | N2          | 11.8 $\pm$ 2.0                      | 5.6 $\pm$ 0.8  | 3.3 $\pm$ 0.5 |
|                               | C3          | 13.2 $\pm$ 1.2                      | 4.6 $\pm$ 0.3  | 2.3 $\pm$ 0.2 |
|                               | C4          | 13.3 $\pm$ 0.4                      | 3.8 $\pm$ 2.0  | 2.3 $\pm$ 1.5 |

| Enzyme                                        | <i>p</i> -value | Wild-type     |               | N2            |               | C3            |               | C4             |                |
|-----------------------------------------------|-----------------|---------------|---------------|---------------|---------------|---------------|---------------|----------------|----------------|
|                                               |                 | ZT3           | ZT15          | ZT3           | ZT15          | ZT3           | ZT15          | ZT3            | ZT15           |
| Phosphoglucumutase                            | 0.311           | 8447<br>± 379 | 8180<br>± 562 | 8376<br>± 593 | 8959<br>± 292 | 9106<br>± 246 | 8651<br>± 349 | 8097<br>± 741  | 9784 ±<br>303  |
| Phosphoglucoisomerase<br>total                | 0.267           | 1110<br>± 105 | 1142<br>± 121 | 1146<br>± 158 | 1232<br>± 72  | 1252<br>± 60  | 1272<br>± 96  | 1096<br>± 174  | 1406 ±<br>30   |
| Phosphoglucoisomerase<br>cytosolic            | 0.901           | 746 ±<br>53   | 792 ±<br>48   | 792<br>± 90   | 806 ±<br>25   | 802<br>± 27   | 795 ±<br>50   | 704 ±<br>60    | 862 ±<br>41    |
| Phosphoglucoisomerase<br>plastidial (derived) | 0.122           | 364 ±<br>73   | 350 ±<br>81   | 354<br>± 77   | 427 ±<br>73   | 450<br>± 51   | 477 ±<br>54   | 392 ±<br>132   | 544 ±<br>25    |
| Rubisco initial                               | 0.242           | 10.3<br>± 0.9 | 13.0<br>± 0.6 | 10.6<br>± 0.8 | 14.0<br>± 0.9 | 11.6<br>± 0.6 | 11.3<br>± 0.9 | 10.1<br>± 1.0  | 12.2 ±<br>0.6  |
| Rubisco maximal                               | 0.115           | 12.1<br>± 0.7 | 13.8<br>± 0.8 | 13.1<br>± 0.8 | 17.0<br>± 0.9 | 11.8<br>± 0.2 | 13.7<br>± 1.1 | 11.7<br>± 0.5  | 15.3 ±<br>0.4  |
| Rubisco activation<br>(derived)               | n/d             | 85            | 94            | 81            | 82            | 98            | 82            | 86             | 80             |
| Glucokinase                                   | 0.672           | 90 ±<br>12    | 140 ±<br>7    | 91 ±<br>14    | 132 ±<br>8    | 107<br>± 29   | 95 ±<br>17    | 123 ±<br>15    | 155 ±<br>18    |
| Fructokinase                                  | 0.080           | 110 ±<br>6    | 152 ±<br>13   | 132<br>± 9    | 140 ±<br>8    | 123<br>± 14   | 145 ±<br>7    | 145 ±<br>10    | 184 ±<br>12    |
| UDPglucose<br>pyrophosphorylase               | >0.001          | 8464<br>± 405 | 7635<br>± 555 | 7604<br>± 589 | 8340<br>± 394 | 9908<br>± 308 | 9661<br>± 728 | 10958<br>± 673 | 11815<br>± 735 |
| Triose phosphate<br>isomerase                 | 0.712           | 15.7<br>± 0.7 | 16.2<br>± 0.9 | 15.6<br>± 1.0 | 16.8<br>± 0.6 | 16.1<br>± 0.4 | 16.1<br>± 0.4 | 14.2<br>± 1.3  | 17.1 ±<br>0.6  |
| Transketolase                                 | 0.015           | 5825<br>± 318 | 5677<br>± 335 | 6507<br>± 301 | 6897<br>± 153 | 5830<br>± 246 | 5471<br>± 263 | 5836<br>± 263  | 5659 ±<br>156  |
| Sucrose phosphate<br>synthase                 | 0.626           | 273 ±<br>17   | 267 ±<br>23   | 312<br>± 29   | 343 ±<br>14   | 298<br>± 14   | 295 ±<br>17   | 276 ±<br>21    | 305 ±<br>11    |
| Nitrate reductase                             | 0.811           | 1052<br>± 77  | 564 ±<br>56   | 1023<br>± 99  | 695 ±<br>56   | 1044<br>± 24  | 642 ±<br>55   | 914 ±<br>56    | 709 ±<br>41    |

Table S3. Activities of enzymes of primary metabolism.

Measurements were made on wild-type plants and on *adg1* mutants expressing either APL1 (line N2) or GlgC-TM (lines C3 and C4). Values are means ± SE of measurements on four to six rosettes of plants grown in 12:12 conditions and harvested 3 h after dawn (ZT3) or 3 h after the start of the night (ZT15). All values are nmol min<sup>-1</sup> g<sup>-1</sup> fresh weight except those for Rubisco and triose phosphate isomerase which are μmol min<sup>-1</sup> g<sup>-1</sup> fresh weight and those for Rubisco activation which are percentages. Plastidial phosphoglucumutase activity was calculated by subtracting cytosolic from total activity (Kruckeberg et al., 1989; Gibon et al., 2009). Rubisco activation is initial activity expressed as a percentage of total activity (measured according to Sulpice et al., 2007). Data were analyzed using a general linear model and ANOVA to test for the effects of genotype, including time of day as a covariant. Enzyme activities that show significant differences between genotypes with the endogenous AGPase (WT and N2) and those with the GlgC-TM AGPase (C3 and C4) are indicated by the *p*-value displayed in the table. n/d= not determined.

Table S4. qPCR primers used in this study. *ACT2* was used as the control in the experiment shown in Figure 2a. GAPDH and spike-in controls were used in the experiment shown in Figure S1 (see Czechowski et al., 2004).

| <b>Gene/spike name</b> | <b>forward primer</b> | <b>Forward primer sequence 5' to 3':</b> | <b>reverse primer</b> | <b>reverse primer sequence 5' to 3':</b> |
|------------------------|-----------------------|------------------------------------------|-----------------------|------------------------------------------|
| <i>APL1</i>            | At5g19220-f           | GTTCCCATGGGAATAGGAGAGAACAC               | At5g19220-r           | GACCTATCTGCTTCTTGTATTCCCTC               |
| <i>APL2</i>            | At1g27680-f           | TGGTCATAGCGAATGCAGATGGCGTG               | At1g27680-r           | AATGGTGGCGTTCTTCAGCACAAACGG              |
| <i>APL4</i>            | At2g21590-f           | GCTAATTTAGCTCTTGTGAGGAGCG                | At2g21590-r           | GGAGGAACCGAGGAGAAGTGTAGAAC               |
| <i>APL3</i>            | At4g39210-f           | CGGATTGTAAATTCGGTAATCTCAC                | At4g39210-r           | GCTCCTAACATAAGAGTATCCTGAAG               |
| <i>APS1</i>            | At5g48300-f           | CTACACACAGCCGCGTTATTACCAC                | At5g48300-r           | TATGCAGGAACGGAGTCCAACCACAG               |
| <i>GlgC-TM</i>         |                       | TGGCGAGTATGGGTATCTACG                    |                       | GTGGGATTGTACGCAAGAGAG                    |
| <i>ACT2 155</i>        | H282-155-ACT2         | AACTCTCCCGCTATGTATGTCGC                  | H283-155-ACT2         | CAATACCGGTTGTACGACCACTG                  |
| <i>ACT2 633</i>        | H284-633-ACT2         | ACTTTCATCAGCCGTTTTGA                     | H285-633-ACT2         | ACGATTGGTTGAATATCATCAG                   |
| Spike1                 | H251-A1780s1-f1       | GATGCCCGACCATCATTTAG                     | H252-A1780s1-r1       | GTGAGGGTAATGTCCGCTTC                     |
| Spike2                 | H253-A1780s2-f1       | ATTGCGCTCGCCATATACAC                     | H254-A1780s2-r1       | GCTGGGATCAGGAGGAGAAG                     |
| Spike3                 | H255-A1780s3-f1       | GATCGTTTGCCTGCATTACC                     | H256-A1780s3-r1       | GAGAGCGTCAGCCATACCAC                     |
| Spike4                 | H257-A1780s4-f1       | TACGTCGCACAACCACAATC                     | H258-A1780s4-r1       | CAGCGCCACTAACCCTACTAC                    |
| Spike5                 | H302-S5f-2            | ACAAAGGCAGCGTTGAAAAC                     | H301-S5r-1            | TAGTGTCTGCAGCCATACC                      |
| Spike6                 | Spike-6f-2            | CGCAAAGTCTCTCCTCTTGG                     | Spike-6r-2            | CAGTAGCCATTGCGGAAGAT                     |
| Spike7                 | H313-S7f-3            | CTGAACCAGACTGCACATGG                     | H314-S7r-3            | ACGCTCATGGGCTTGTTTAT                     |
| Spike8                 | H315-S8f-3            | TCATTAAGCGGAAGCAAT                       | H316-S8r-3            | AAATCTCCAGCACCGTCAG                      |
